# Supplementary material for: Photolysis of tolfenamic acid in aqueous and organic solvents: a kinetic study
Source: Royal Society of Chemistry journal article supplement (doi:10.1039/d4ra01369g), 2024-01-01
Supplement: d4ra01369g1.pdf [file d4ra01369g1.pdf]

## SUPPLEMENTARY DATA

*Kazi et al.*

### *Research Article*

#### **Photolysis of Tolfenamic Acid in Aqueous and Organic Solvents: A Kinetic Study**

Sadia Hafeez Kazi<sup>1</sup>, Muhammad Ali Sheraz<sup>1</sup>, Zubair Anwar<sup>2\*</sup>, Syed Ghulam Musharraf<sup>3</sup>, Sofia Ahmed<sup>1</sup>, Raheela Bano<sup>4</sup>, Tania Mirza<sup>2</sup>, Kyuyoung Heo <sup>[5]</sup>, Jun-Hee Na <sup>[6]</sup>

<sup>1</sup>Department of Pharmaceutics, Baqai Institute of Pharmaceutical Sciences, Baqai Medical University, Karachi–75340, Pakistan

<sup>2</sup>Department of Pharmaceutical Chemistry, Baqai Institute of Pharmaceutical Sciences, Baqai Medical University, Karachi–75340, Pakistan

<sup>3</sup>Third World Center for Science and Technology, H.E.J. Research Institute of Chemistry, University of Karachi, Karachi–75270, Pakistan

<sup>4</sup>Dow College of Pharmacy, Dow University of Health Sciences (Ojha Campus), Karachi, Pakistan

<sup>5</sup>Reliability Assessment Center, Korea Research Institute of Chemical Technology Daejeon 34114, Republic of Korea

<sup>6</sup>Department of Convergence System Engineering, Chungnam National University, Daejeon 34134, Republic of Korea

\* Corresponding author: [zubair\\_ana@hotmail.com](mailto:zubair_ana@hotmail.com); [zubair\\_ana@baqai.edu.pk](mailto:zubair_ana@baqai.edu.pk)

*Muhammad Ali Sheraz*: <https://orcid.org/0000-0002-6333-8178>

*Zubair Anwar*: <https://orcid.org/0000-0003-3822-7588>

*Syed Ghulam Musharraf*: <https://orcid.org/0000-0003-1663-0210>

*Sofia Ahmed*: <https://orcid.org/0000-0002-0731-1237>

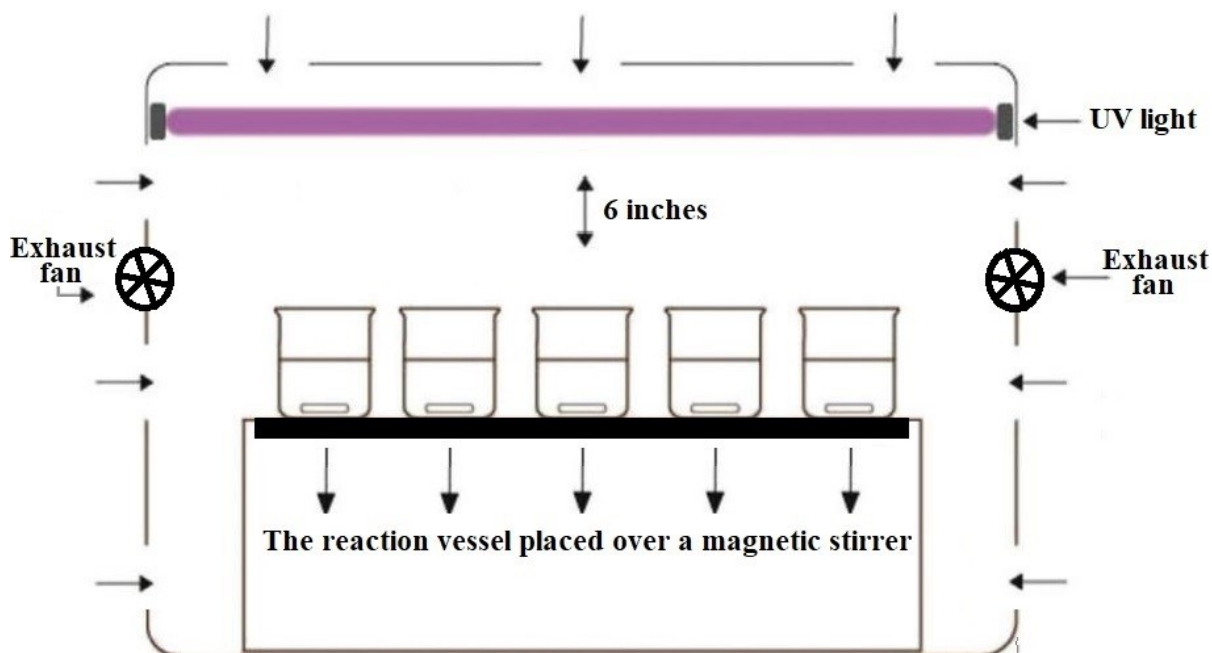

**Fig. S1.** A diagrammatic representation of the perforated radiation chamber. The arrows indicate the perforations used for the fresh air circulation along with the exhaust fans.

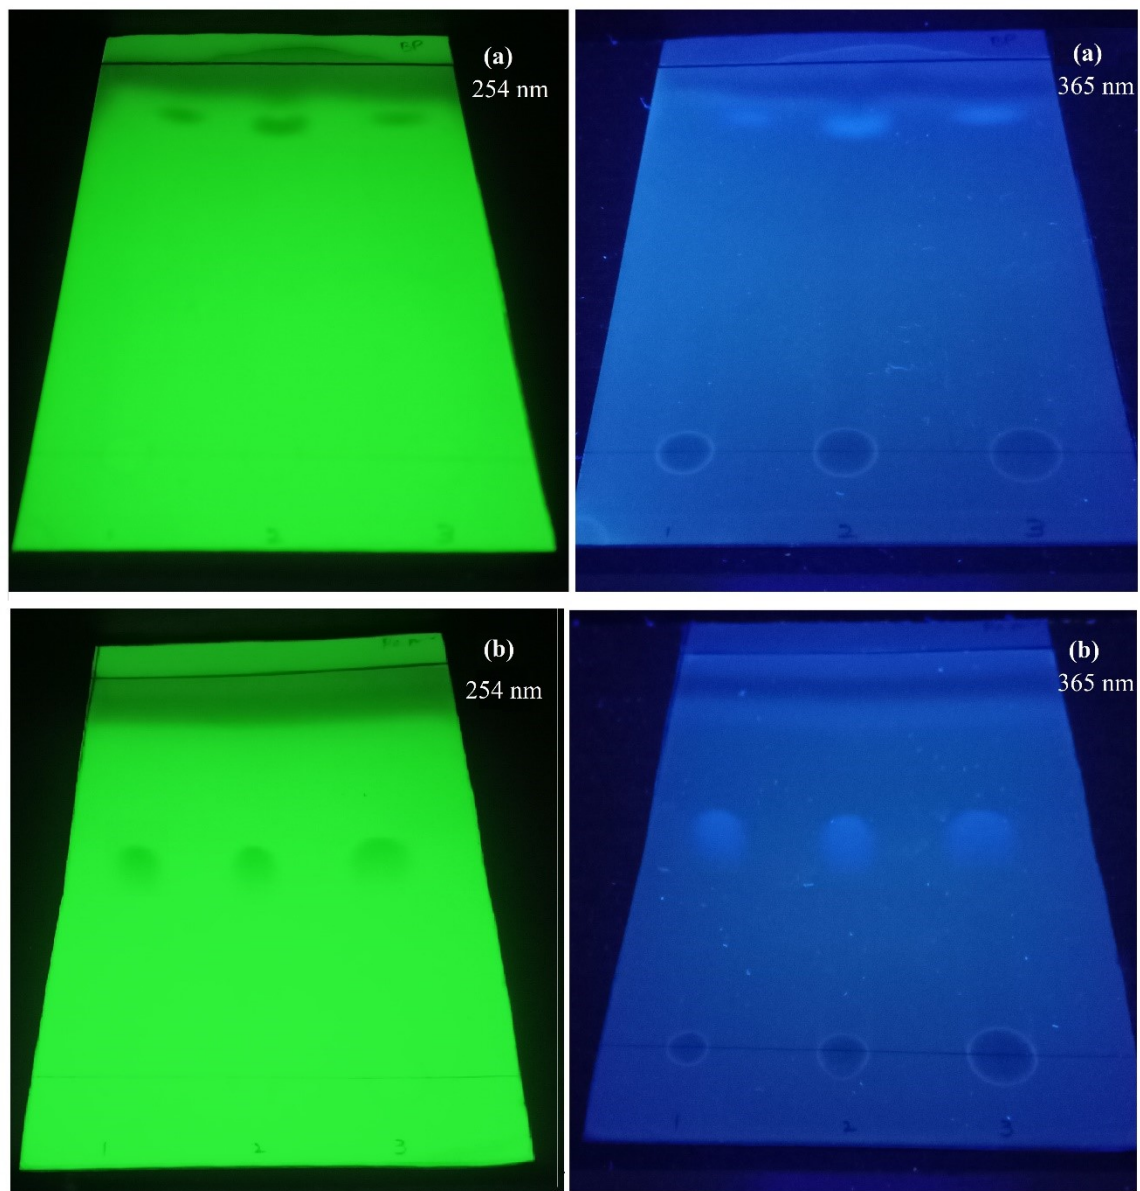

**Fig. S2.** TLC plates of TA at 254 and 365 nm. (a) British Pharmacopoeia [28] (b) Abdelwahab et al. [33].

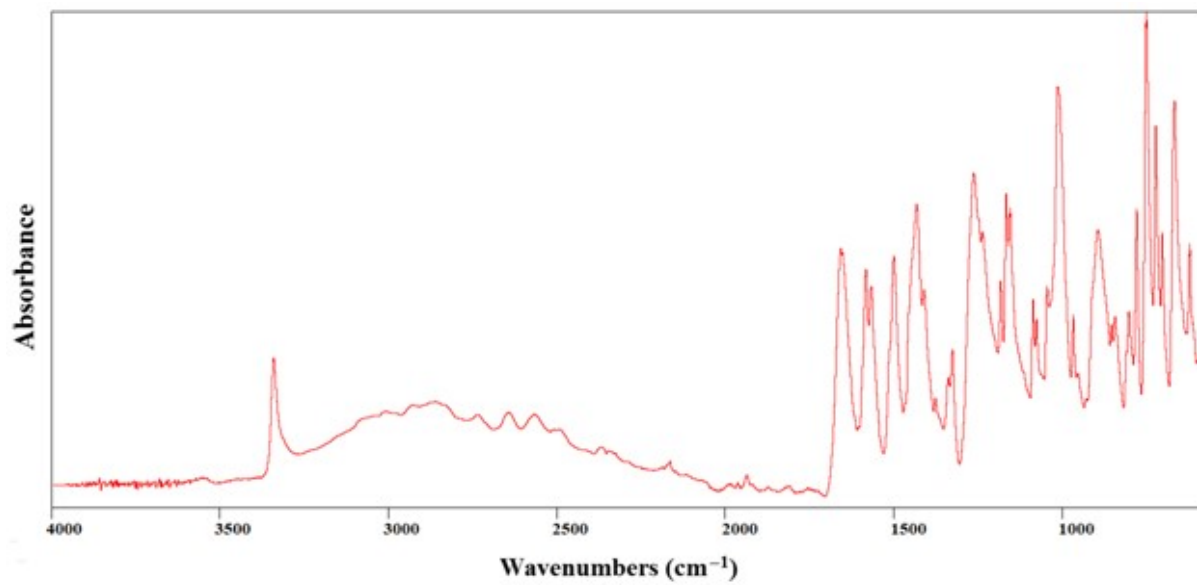

**Fig. S3.** Structure and FTIR spectrum of TA.

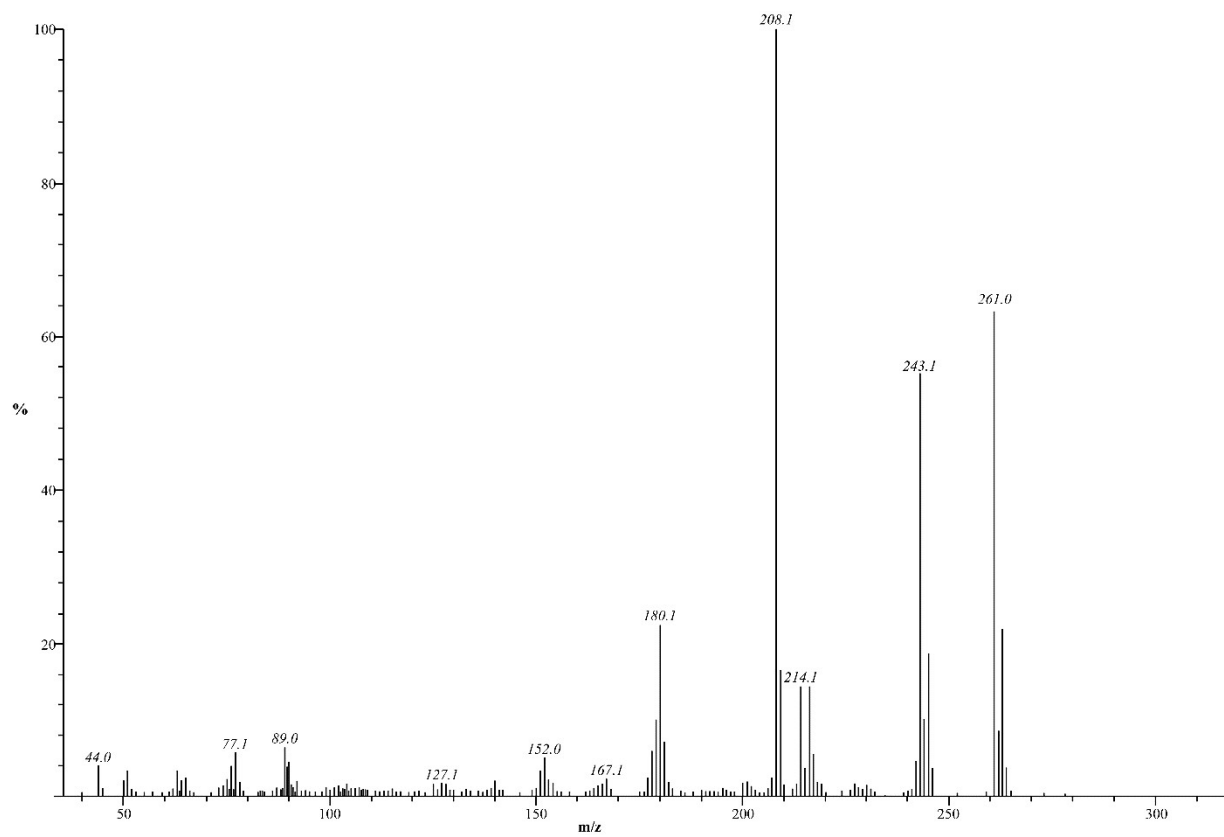

**Fig. S4.** The mass spectrum of TA.

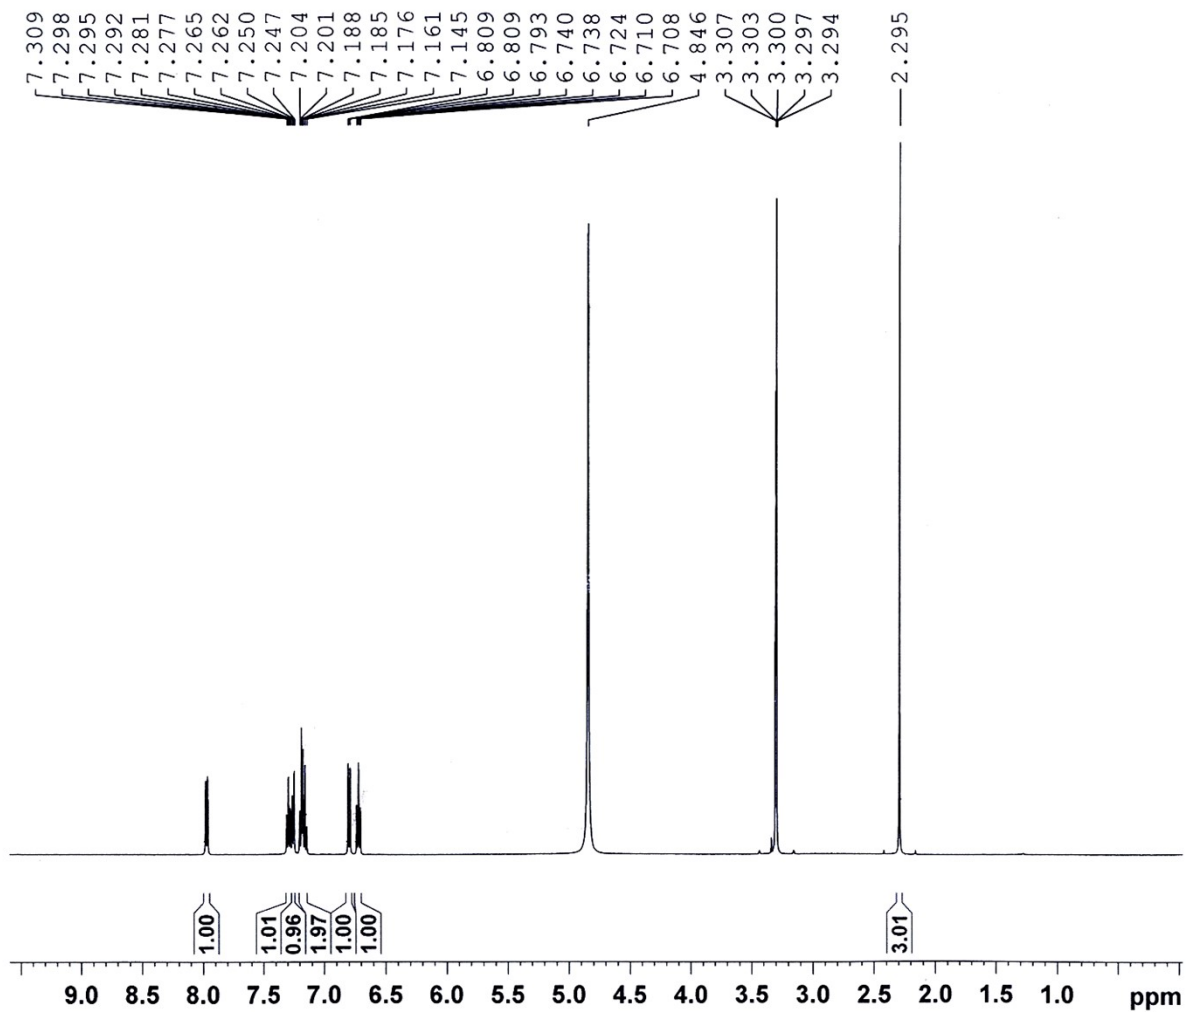

Fig. S5.  $^1\text{H}$  NMR spectrum of TA.

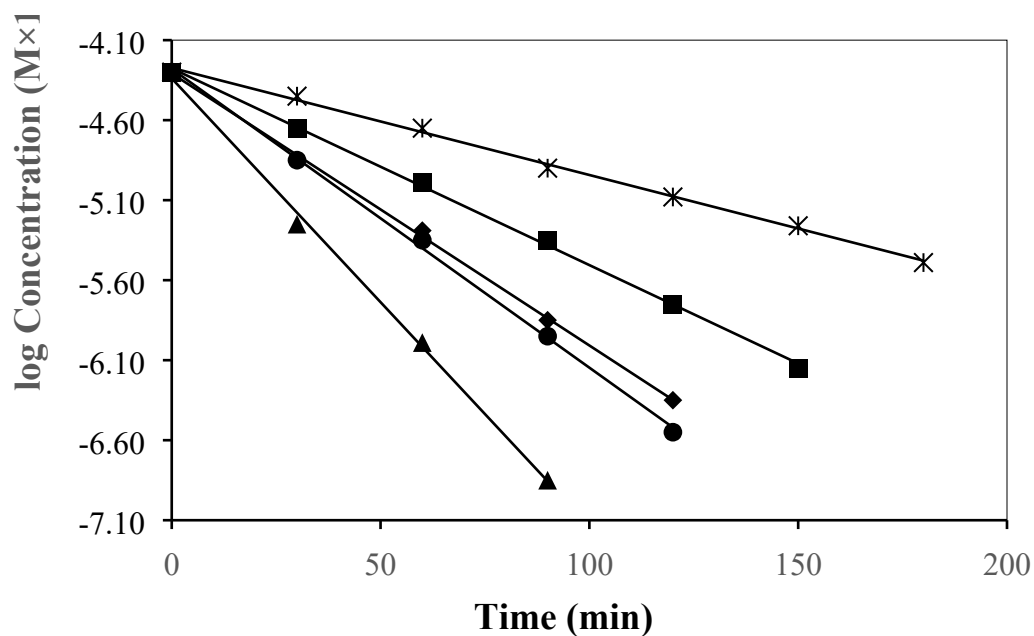

**Fig. S6.** Apparent first-order plots for the photolysis of TA at pH: (●) 2.0; (▲) 3.0; (◆) 4.0; (■) 5.0; (\*) 6.0.

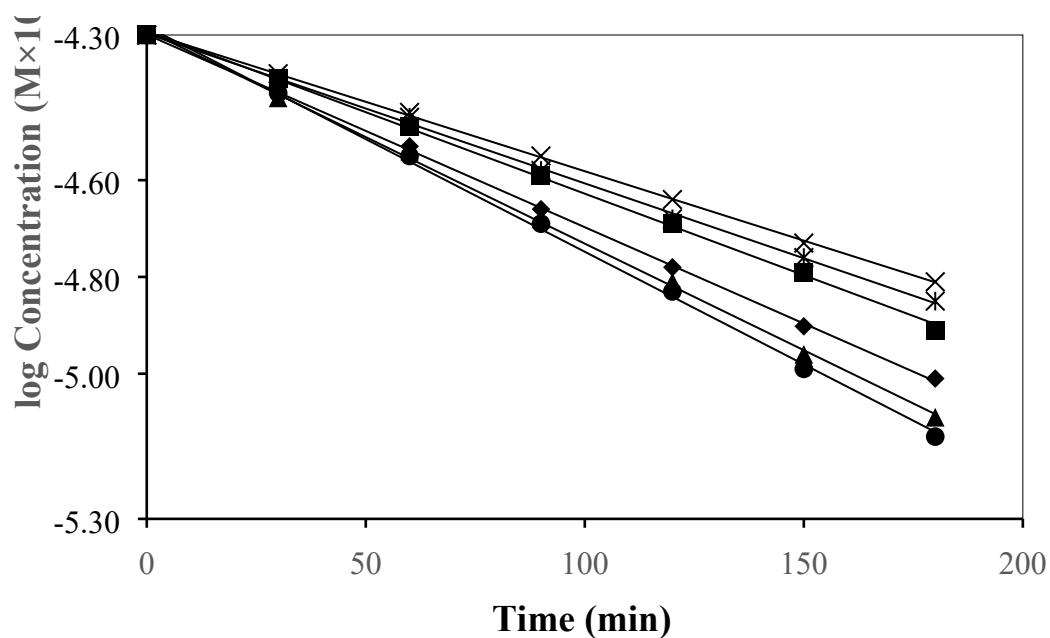

**Fig. S7.** Apparent first-order plots for the photolysis of TA at pH: (●) 7.0; (▲) 8.0; (◆) 9.0; (■) 10.0; (\*) 11.0; (×) 12.0.

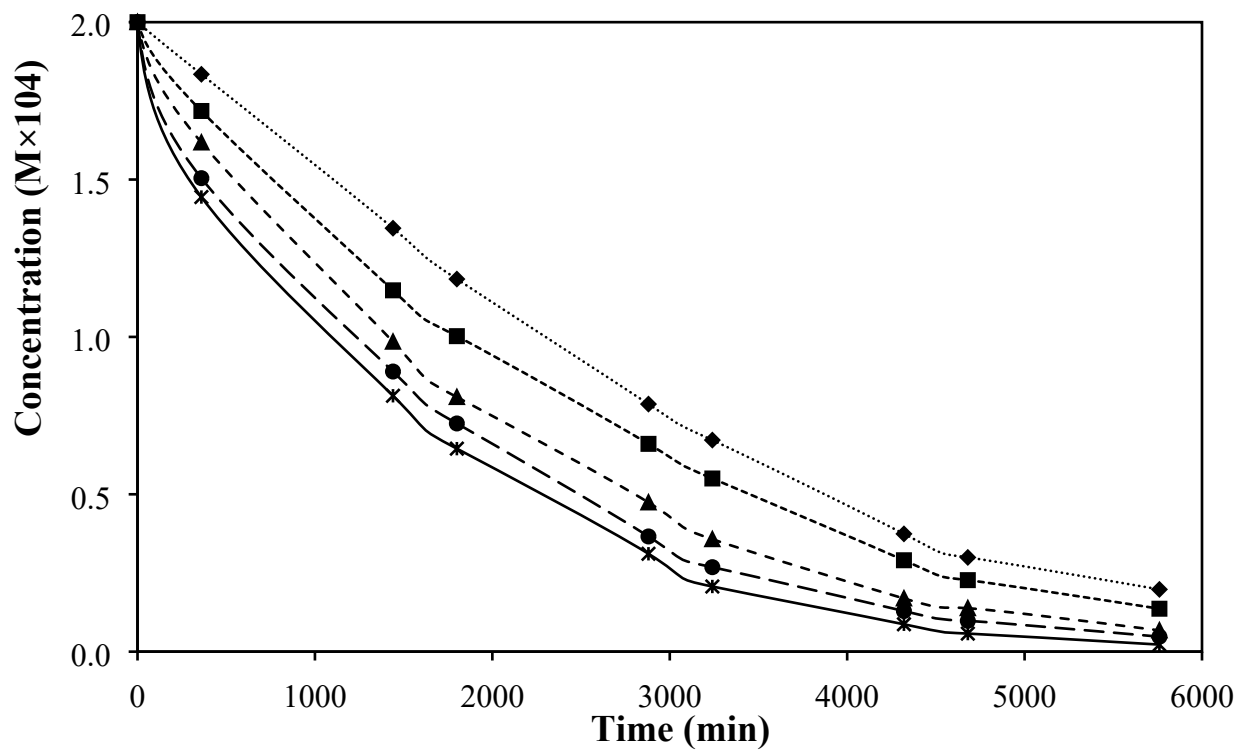

**Fig. S8.** The photolysis plots of TA in various organic solvents ( $2.0 \times 10^4$  M).  
(\* ) Acetonitrile, (●) Methanol, (▲) Ethanol, (■) Propanol, and (◆) Butanol.



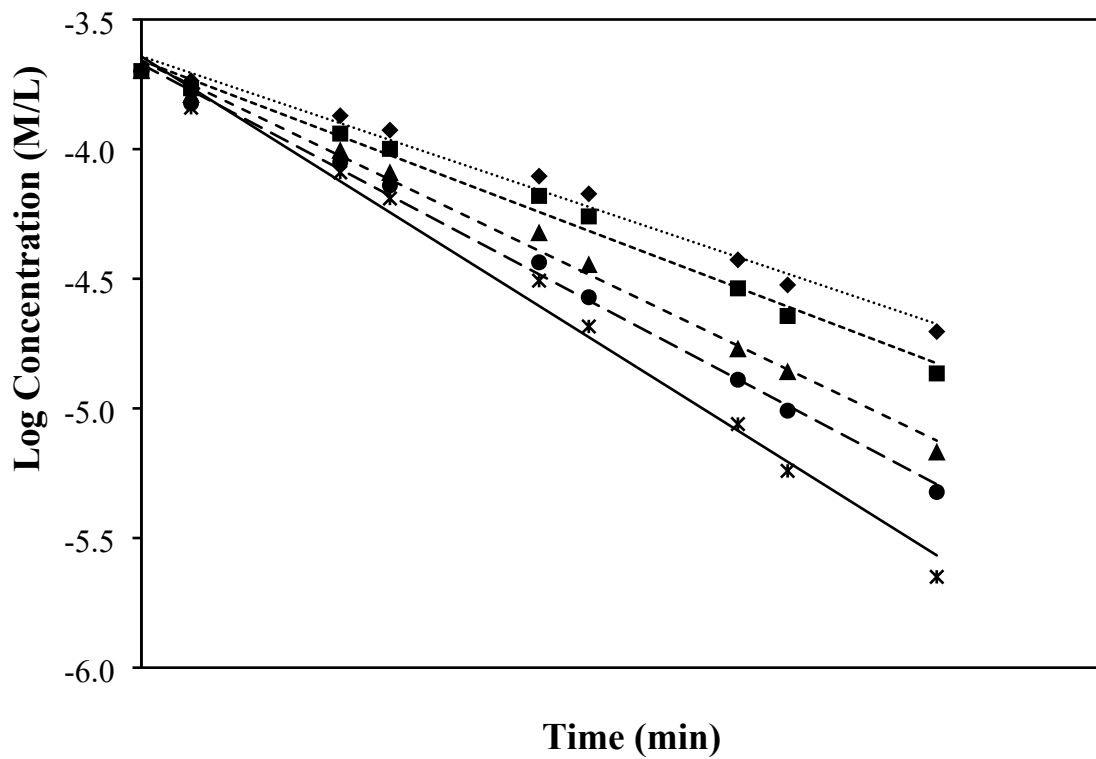

**Fig. S9.** Apparent first-order plots for the photolysis of TA in various organic solvents. (\* Acetonitrile, (●) Methanol, (▲) Ethanol, (■) Propanol, and (◆) Butanol.

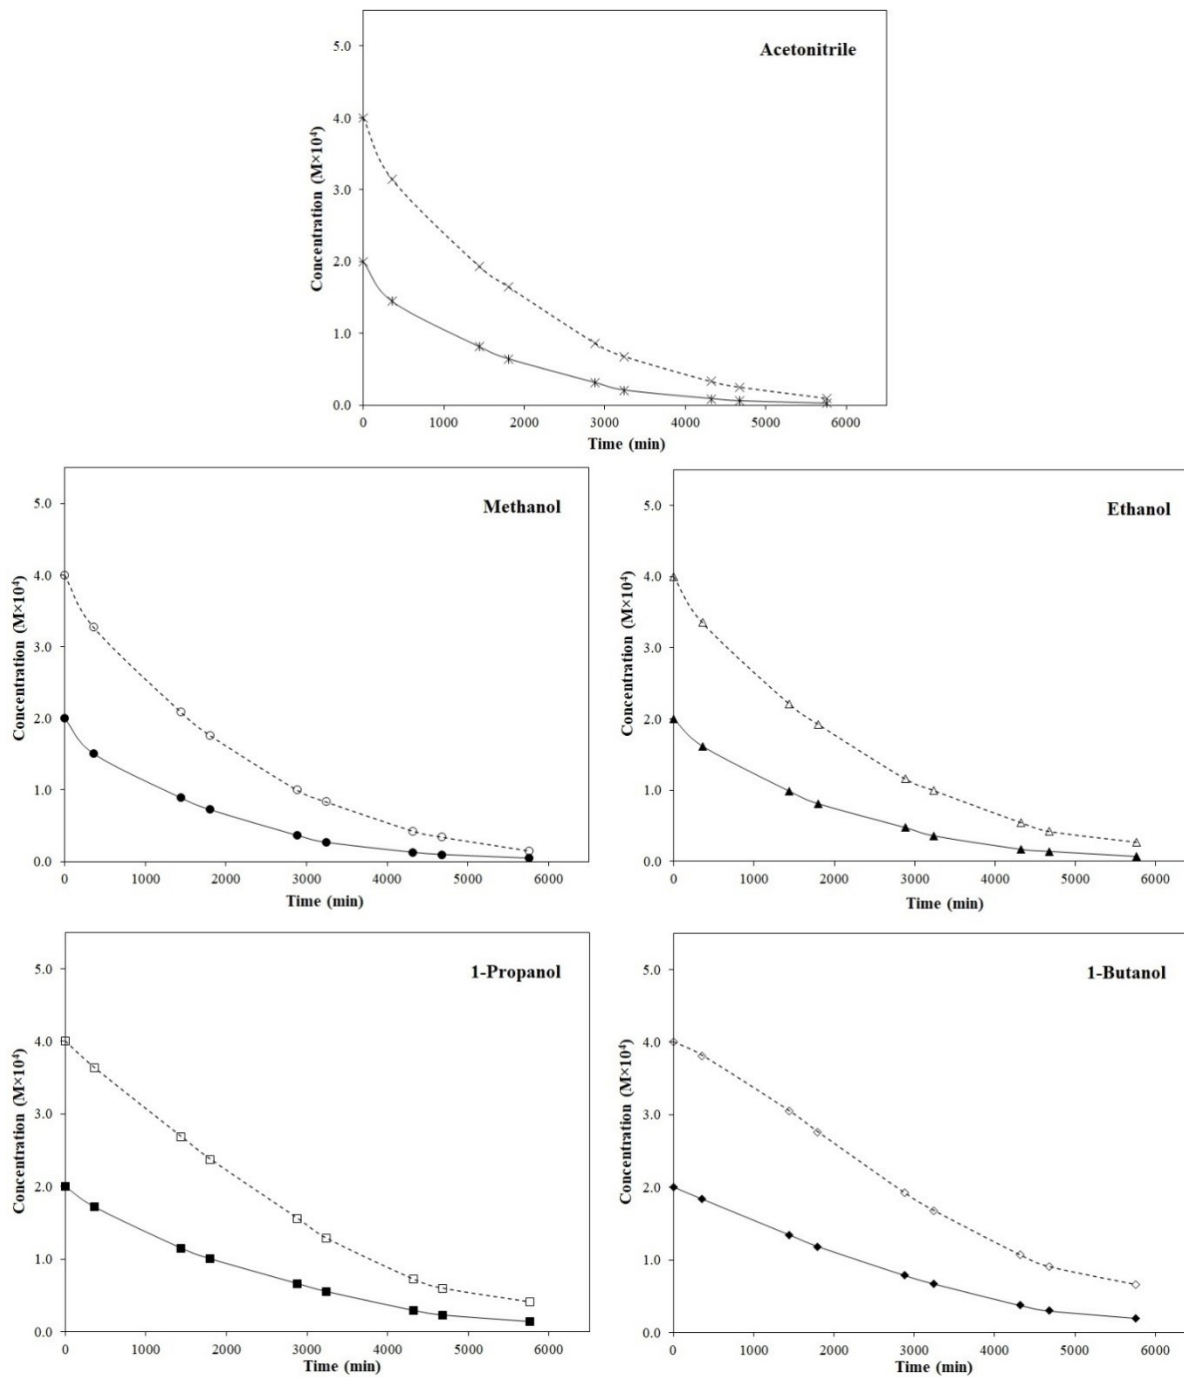

**Fig. S10.** The comparative plots of the photolysis of TA concentrations in various organic solvents. (—)  $2.0 \times 10^4$  M (-----)  $4.0 \times 10^4$  M.

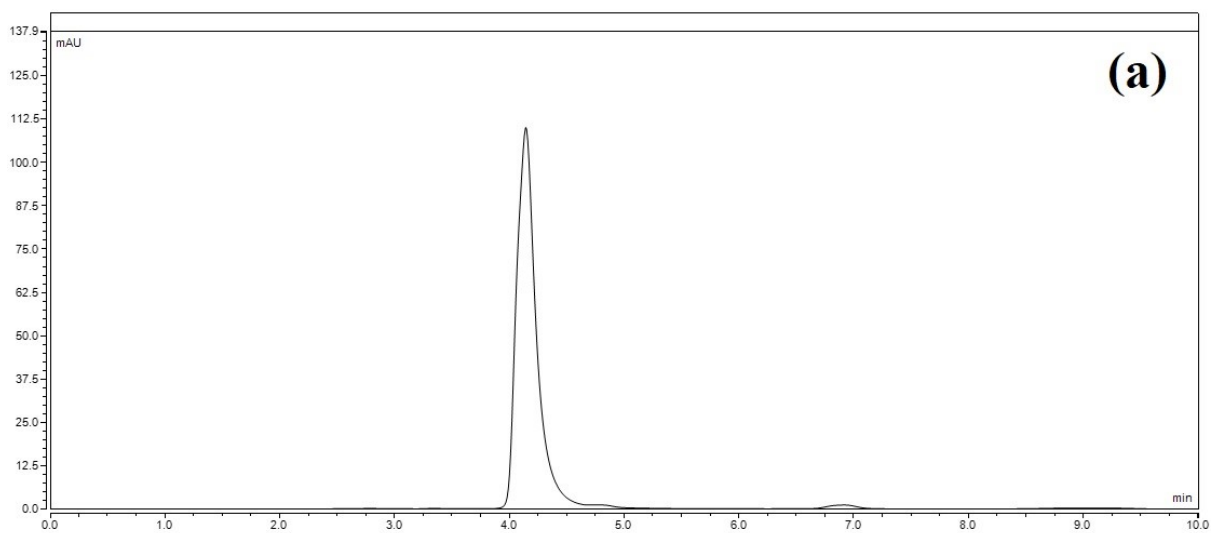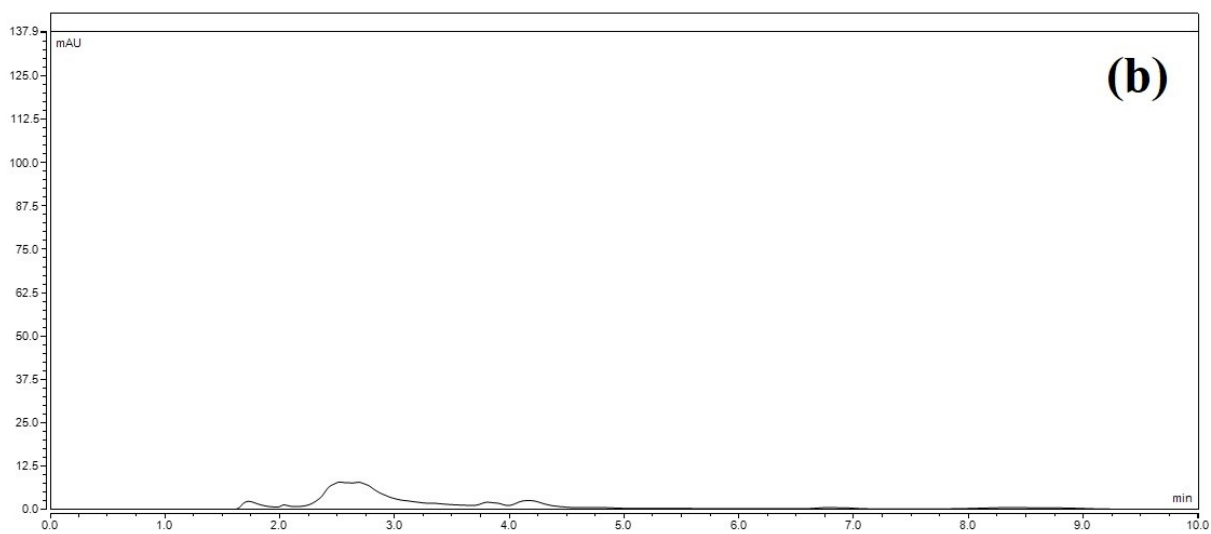

**Fig. S11.** HPLC chromatogram of TA in acetonitrile at (a) 0 h and (b) after 96 h irradiation.

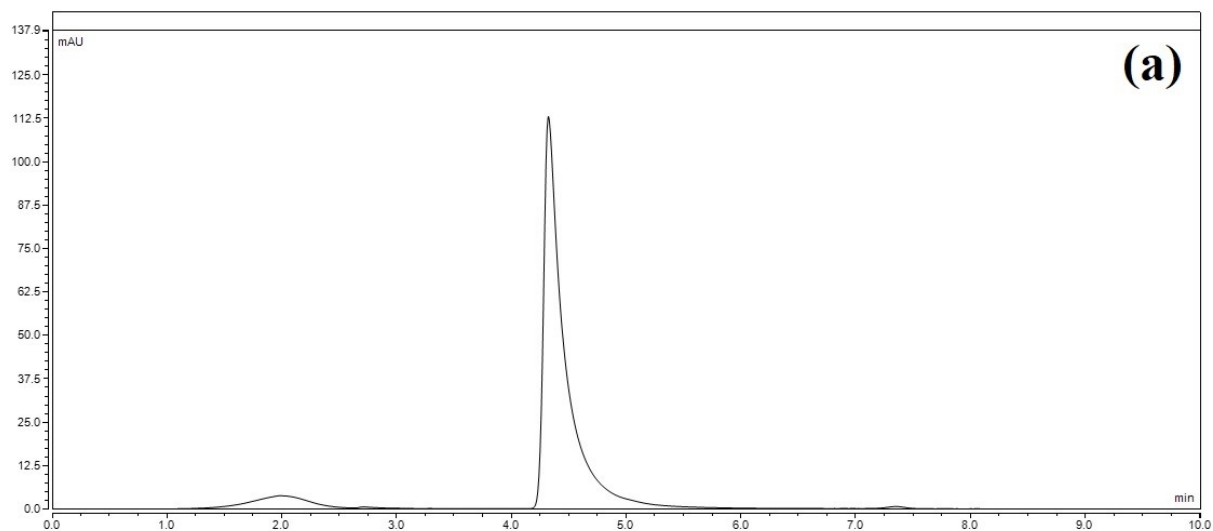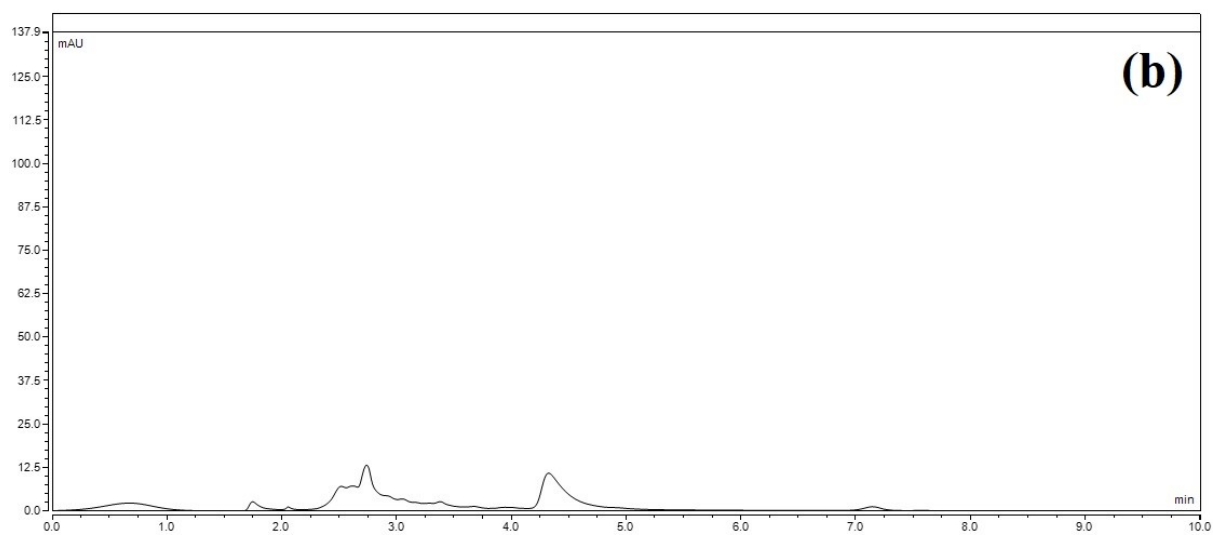

**Fig. S12.** HPLC chromatogram of TA in methanol at (a) 0 h and (b) after 96 h irradiation.

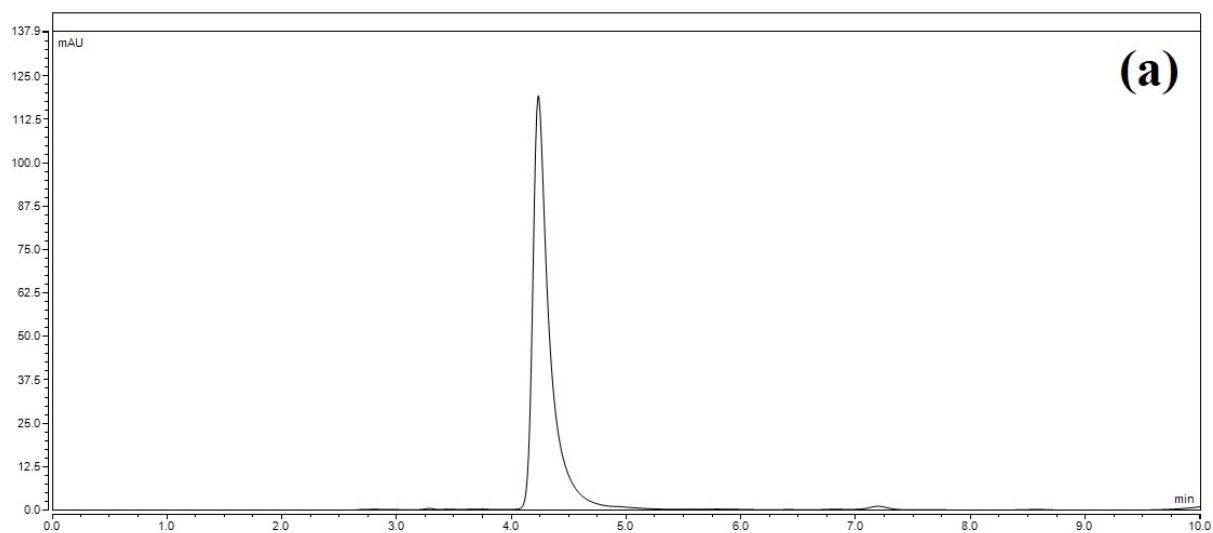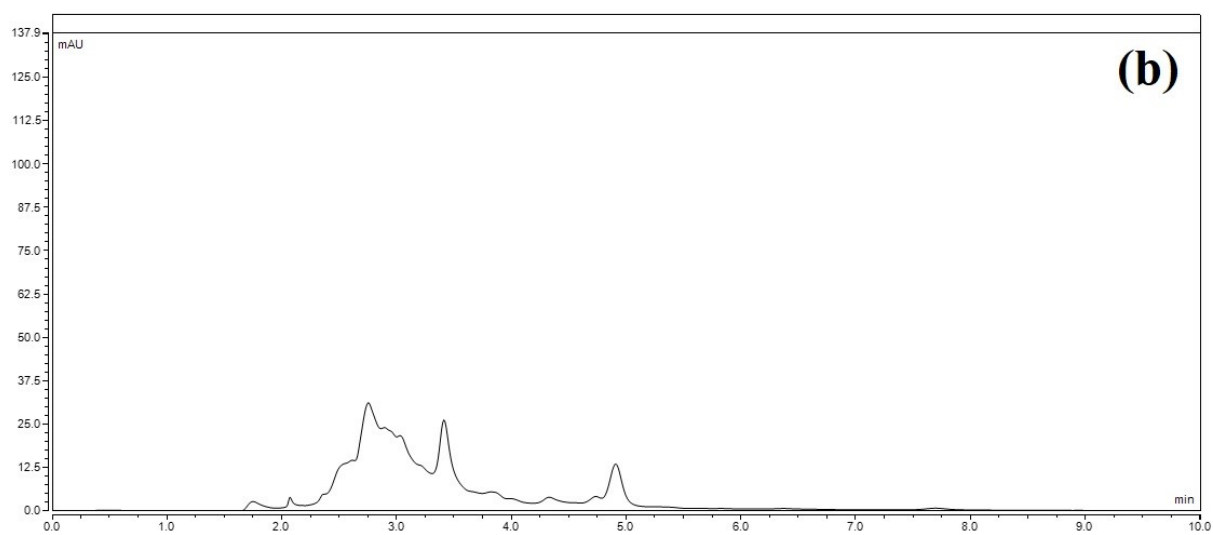

**Fig. S13.** HPLC chromatogram of TA in ethanol at (a) 0 h and (b) after 96 h irradiation.

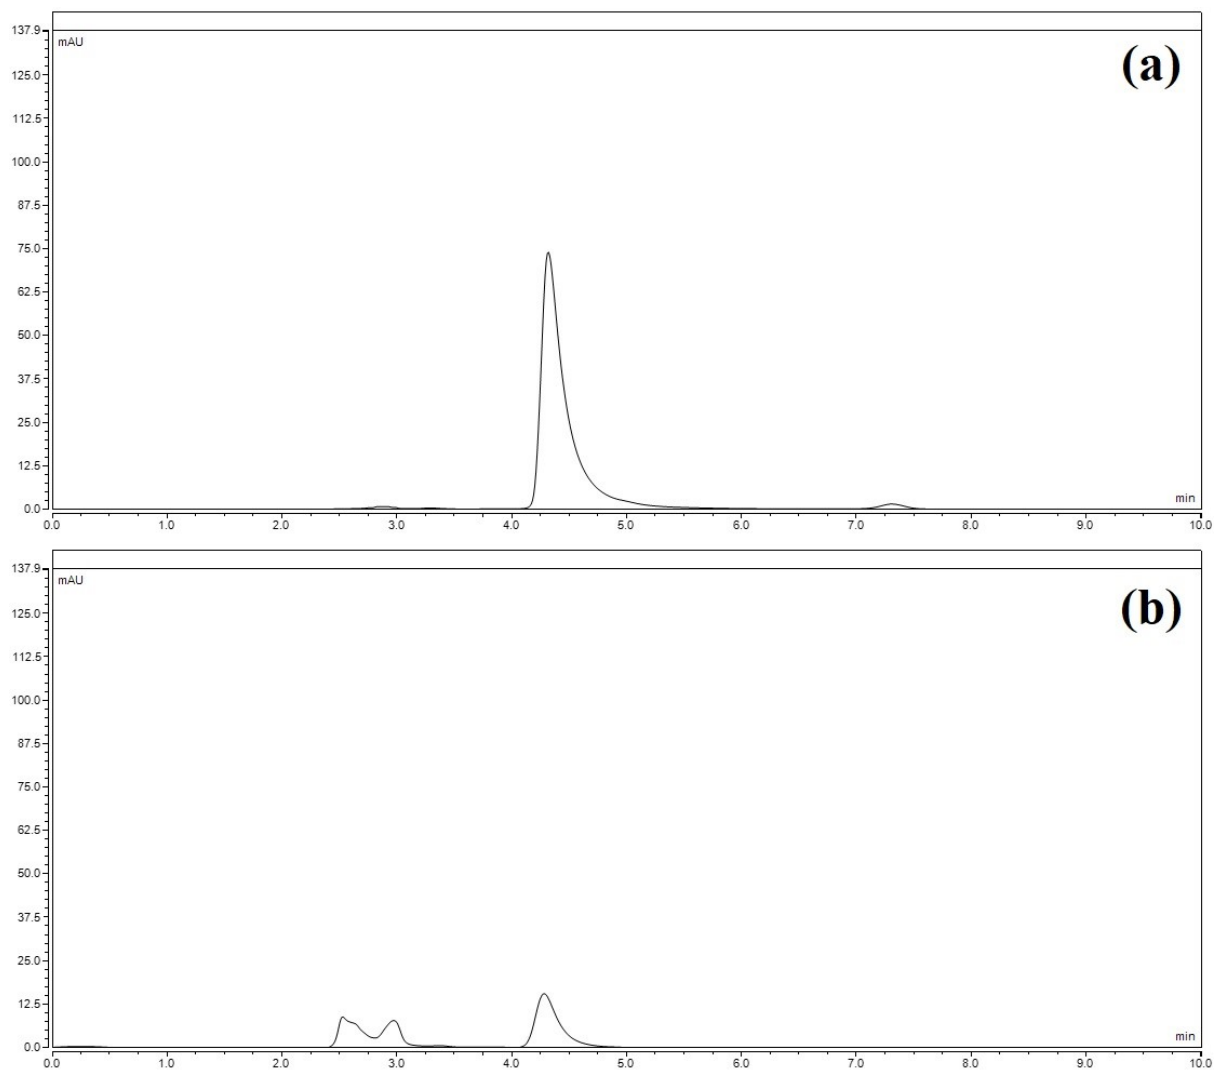

**Fig. S14.** HPLC chromatogram of TA in 1-propanol at (a) 0 h and (b) after 96 h irradiation.

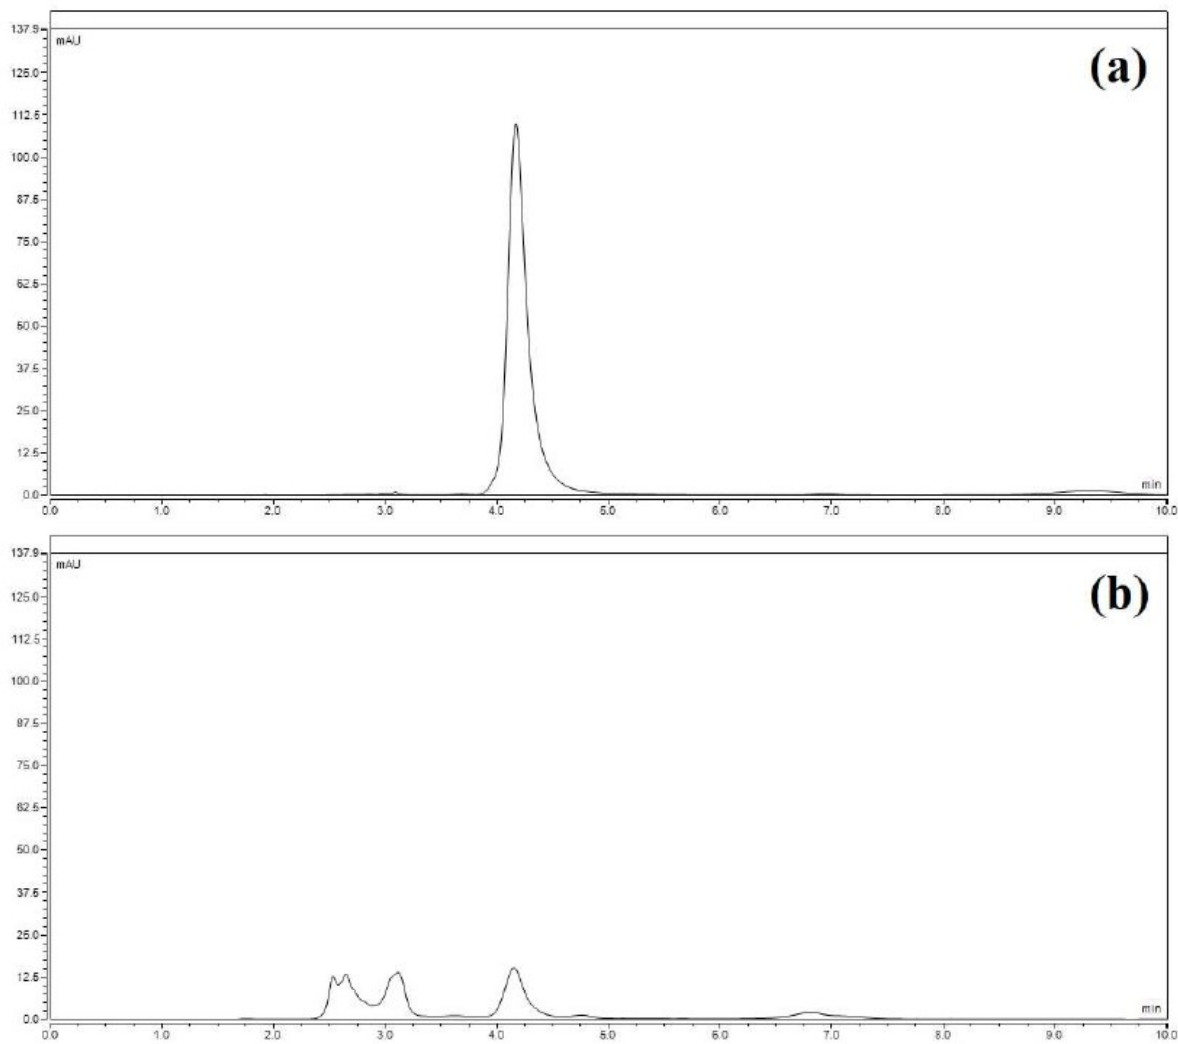

**Fig. S15.** HPLC chromatogram of TA in 1-butanol at (a) 0 h and (b) after 96 h irradiation.

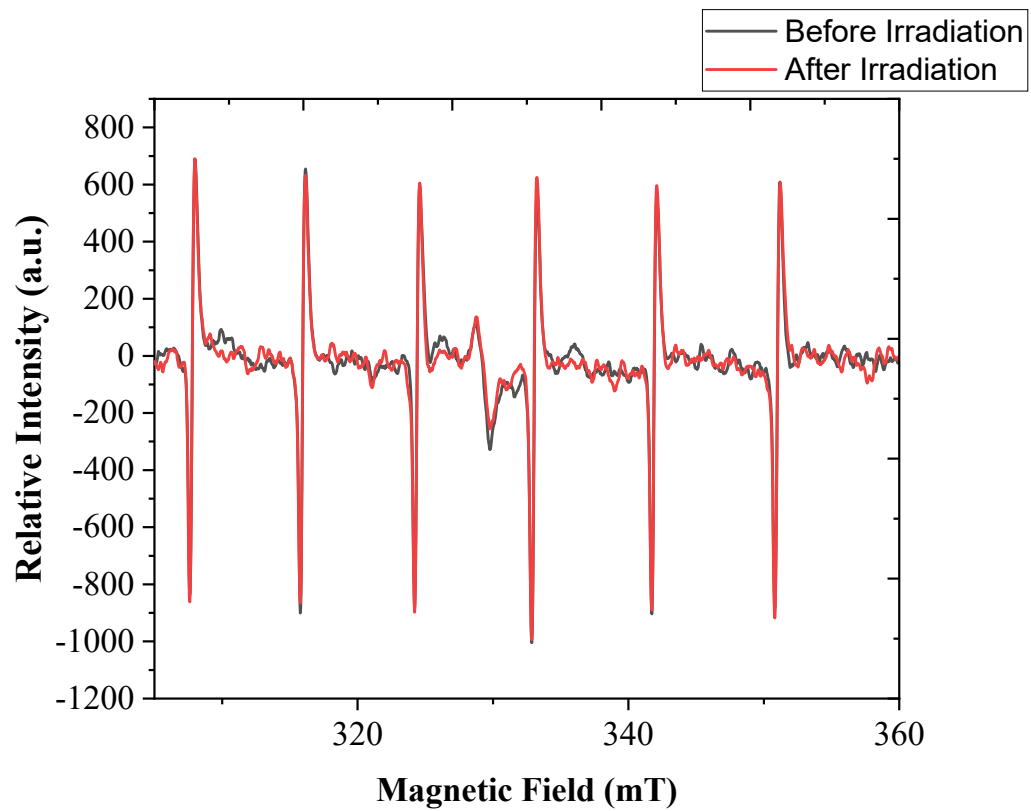

**Fig. S16.** ESR spectra of TA in acetonitrile at room temperature before and after irradiation.



**Table S1.** Photodegradation of TA in the acidic region (2.0–6.0)

| Time<br>(min)                     | pH   |      |      |      |      |
|-----------------------------------|------|------|------|------|------|
|                                   | 2.0  | 3.0  | 4.0  | 5.0  | 6.0  |
| Concentration ( $M \times 10^5$ ) |      |      |      |      |      |
| 0                                 | 5.00 | 5.00 | 5.00 | 5.00 | 5.00 |
| 30                                | 1.41 | 0.56 | 1.20 | 2.82 | 3.55 |
| 60                                | 0.45 | 0.10 | 0.51 | 1.12 | 1.86 |
| 90                                | 0.11 | 0.01 | 0.10 | 0.45 | 1.26 |
| 120                               | 0.03 | –    | 0.05 | 0.22 | 0.83 |
| 150                               | –    | –    | –    | 0.07 | 0.60 |
| 180                               | –    | –    | –    | –    | 0.32 |

**Table S2.** Photodegradation of TA in the alkaline region (7.0–12.0)

| Time<br>(min)                     | pH   |      |      |      |      |      |
|-----------------------------------|------|------|------|------|------|------|
|                                   | 7.0  | 8.0  | 9.0  | 10.0 | 11.0 | 12.0 |
| Concentration ( $M \times 10^5$ ) |      |      |      |      |      |      |
| 0                                 | 5.00 | 5.00 | 5.00 | 5.00 | 5.00 | 5.00 |
| 30                                | 3.80 | 3.72 | 3.80 | 4.07 | 4.07 | 4.17 |
| 60                                | 2.82 | 2.88 | 2.95 | 3.24 | 3.39 | 3.47 |
| 90                                | 2.04 | 2.09 | 2.19 | 2.57 | 2.63 | 2.82 |
| 120                               | 1.48 | 1.55 | 1.66 | 2.04 | 2.09 | 2.29 |
| 150                               | 1.02 | 1.10 | 1.25 | 1.62 | 1.74 | 1.86 |
| 180                               | 0.74 | 0.81 | 0.98 | 1.23 | 1.41 | 1.55 |

**Table S3.** The photolysis of TA in various organic solvents ( $2.0 \times 10^4$  M)

| <b>Time<br/>(min)</b> | <b>TA Concentration in Solvents (<math>M \times 10^4</math>)</b> |                 |                |                   |                  |
|-----------------------|------------------------------------------------------------------|-----------------|----------------|-------------------|------------------|
|                       | <b>Acetonitrile</b>                                              | <b>Methanol</b> | <b>Ethanol</b> | <b>1-Propanol</b> | <b>1-Butanol</b> |
| 0                     | 2.00                                                             | 2.00            | 2.00           | 2.00              | 2.00             |
| 360                   | 1.44                                                             | 1.50            | 1.62           | 1.72              | 1.83             |
| 1440                  | 0.81                                                             | 0.89            | 0.98           | 1.15              | 1.35             |
| 1800                  | 0.65                                                             | 0.73            | 0.81           | 1.00              | 1.18             |
| 2880                  | 0.31                                                             | 0.37            | 0.47           | 0.66              | 0.79             |
| 3240                  | 0.21                                                             | 0.27            | 0.36           | 0.55              | 0.67             |
| 4320                  | 0.09                                                             | 0.13            | 0.17           | 0.29              | 0.37             |
| 4680                  | 0.06                                                             | 0.10            | 0.14           | 0.23              | 0.30             |
| 5760                  | 0.02                                                             | 0.05            | 0.07           | 0.14              | 0.20             |

**Table S4.** The photolysis of double-strength TA solution ( $4.0 \times 10^4$  M) in various organic solvents

| <b>Time<br/>(min)</b> | <b>TA Concentration in Solvents (<math>M \times 10^4</math>)</b> |                 |                |                   |                  |
|-----------------------|------------------------------------------------------------------|-----------------|----------------|-------------------|------------------|
|                       | <b>Acetonitrile</b>                                              | <b>Methanol</b> | <b>Ethanol</b> | <b>1-Propanol</b> | <b>1-Butanol</b> |
| 0                     | 4.00                                                             | 4.00            | 4.00           | 4.00              | 4.00             |
| 360                   | 3.14                                                             | 3.27            | 3.35           | 3.64              | 3.81             |
| 1440                  | 1.93                                                             | 2.09            | 2.21           | 2.68              | 3.05             |
| 1800                  | 1.65                                                             | 1.76            | 1.92           | 2.37              | 2.76             |
| 2880                  | 0.86                                                             | 1.00            | 1.16           | 1.56              | 1.92             |
| 3240                  | 0.68                                                             | 0.83            | 0.99           | 1.29              | 1.68             |
| 4320                  | 0.33                                                             | 0.43            | 0.55           | 0.72              | 1.07             |
| 4680                  | 0.25                                                             | 0.34            | 0.42           | 0.60              | 0.91             |
| 5760                  | 0.09                                                             | 0.15            | 0.27           | 0.41              | 0.66             |
